# Supplementary material
Source: PubMed Central journal article supplement (PMC7890756)
Supplement: INC901688_Supplemental_Material1.pdf [file INC901688_Supplemental_Material1.pdf]

Timing of Renal Replacement Therapy for patients with Acute Kidney Injury:  
A Systematic Review and Meta-Analysis - Supplementary Material 1

Mark Andonovic, Richard Shemilt, Malcolm Sim, Jamie Traynor, Martin Shaw, Patrick Mark, Kathryn Puxty

|                                                                                         |           |
|-----------------------------------------------------------------------------------------|-----------|
| <b>Figure s1.1: MEDLINE/CENTRAL search strategy:</b>                                    | <b>2</b>  |
| <b>Figure s1.2: EMBASE search strategy:</b>                                             | <b>2</b>  |
| <b>Figure s1.3: Subgroup analysis of low vs high/unclear risk of bias</b>               | <b>3</b>  |
| <b>Figure s1.4: Subgroup analysis of RRT modality</b>                                   | <b>3</b>  |
| <b>Figure s1.5: Subgroup analysis of inpatients vs ICU only patients</b>                | <b>4</b>  |
| <b>Figure s1.6: Subgroup analysis of medical, surgical and mixed patient population</b> | <b>4</b>  |
| <b>Figure s1.7: Dialysis dependence in survivors at 90 days</b>                         | <b>5</b>  |
| <b>Figure s1.8: Dialysis dependence in survivors at 28 and 60 days</b>                  | <b>5</b>  |
| <b>Figure s1.9: Renal recovery in survivors at 90 days</b>                              | <b>5</b>  |
| <b>Figure s1.10: Adverse Events - Bleeding</b>                                          | <b>6</b>  |
| <b>Figure s1.11: Adverse Events - Arrhythmias</b>                                       | <b>6</b>  |
| <b>Figure s1.12: Adverse Events - Hypotension</b>                                       | <b>6</b>  |
| <b>Figure s1.13: Adverse Events - Hypokalaemia</b>                                      | <b>7</b>  |
| <b>Figure s1.14: Adverse Events - Thrombocytopenia</b>                                  | <b>7</b>  |
| <b>Figure s1.15: Adverse Events - Hypocalcaemia</b>                                     | <b>7</b>  |
| <b>Figure s1.16: Adverse Events – Hyperkalaemia</b>                                     | <b>8</b>  |
| <b>Figure s1.17: Adverse Events - Hypophosphataemia</b>                                 | <b>8</b>  |
| <b>Figure s1.18: Adverse Events - Catheter Related Complications</b>                    | <b>8</b>  |
| <b>Figure s1.19: Inverted funnel plot using overall mortality outcome</b>               | <b>9</b>  |
| <b>Table s1.1: Risk of bias assessment</b>                                              | <b>10</b> |
| <b>Table s1.2: GRADE assessment of evidence</b>                                         | <b>11</b> |

# ▲ Searches

|    |                                                                                                                                                                                                                                                                                    |
|----|------------------------------------------------------------------------------------------------------------------------------------------------------------------------------------------------------------------------------------------------------------------------------------|
| 1  | exp Renal Replacement Therapy/                                                                                                                                                                                                                                                     |
| 2  | exp Renal Dialysis/                                                                                                                                                                                                                                                                |
| 3  | exp Dialysis/                                                                                                                                                                                                                                                                      |
| 4  | exp Hemofiltration/                                                                                                                                                                                                                                                                |
| 5  | exp Hemodiafiltration/                                                                                                                                                                                                                                                             |
| 6  | 1 or 2 or 3 or 4 or 5                                                                                                                                                                                                                                                              |
| 7  | exp Randomized Controlled Trials as Topic/                                                                                                                                                                                                                                         |
| 8  | exp Controlled Clinical Trial/                                                                                                                                                                                                                                                     |
| 9  | 7 or 8                                                                                                                                                                                                                                                                             |
| 10 | (time or timing or early or earlier or late or later or delayed or initiation or start).mp. [mp=title, abstract, heading word, drug trade name, original title, device manufacturer, drug manufacturer, device trade name, keyword, floating subheading word, candidate term word] |
| 11 | 6 and 9 and 10                                                                                                                                                                                                                                                                     |
| 12 | limit 11 to english language                                                                                                                                                                                                                                                       |

Figure s1.1: MEDLINE/CENTRAL search strategy

▼ Search History (12)

|                          |                                                                                                                                                                                                                                                                                      |
|--------------------------|--------------------------------------------------------------------------------------------------------------------------------------------------------------------------------------------------------------------------------------------------------------------------------------|
| <input type="checkbox"/> | # ▲ Searches                                                                                                                                                                                                                                                                         |
| <input type="checkbox"/> | 1 exp renal replacement therapy/                                                                                                                                                                                                                                                     |
| <input type="checkbox"/> | 2 exp hemodialysis/                                                                                                                                                                                                                                                                  |
| <input type="checkbox"/> | 3 exp dialysis/                                                                                                                                                                                                                                                                      |
| <input type="checkbox"/> | 4 exp hemofiltration/                                                                                                                                                                                                                                                                |
| <input type="checkbox"/> | 5 exp hemodiafiltration/                                                                                                                                                                                                                                                             |
| <input type="checkbox"/> | 6 1 or 2 or 3 or 4 or 5                                                                                                                                                                                                                                                              |
| <input type="checkbox"/> | 7 (time or timing or early or earlier or late or later or delayed or initiation or start).mp. [mp=title, abstract, heading word, drug trade name, original title, device manufacturer, drug manufacturer, device trade name, keyword, floating subheading word, candidate term word] |
| <input type="checkbox"/> | 8 exp randomized controlled trial/                                                                                                                                                                                                                                                   |
| <input type="checkbox"/> | 9 exp controlled clinical trial/                                                                                                                                                                                                                                                     |
| <input type="checkbox"/> | 10 8 or 9                                                                                                                                                                                                                                                                            |
| <input type="checkbox"/> | 11 6 and 7 and 10                                                                                                                                                                                                                                                                    |
| <input type="checkbox"/> | 12 limit 11 to english language                                                                                                                                                                                                                                                      |

Save Remove Combine with: AND OR

Figure s1.2: EMBASE search strategy

## Risk of Bias

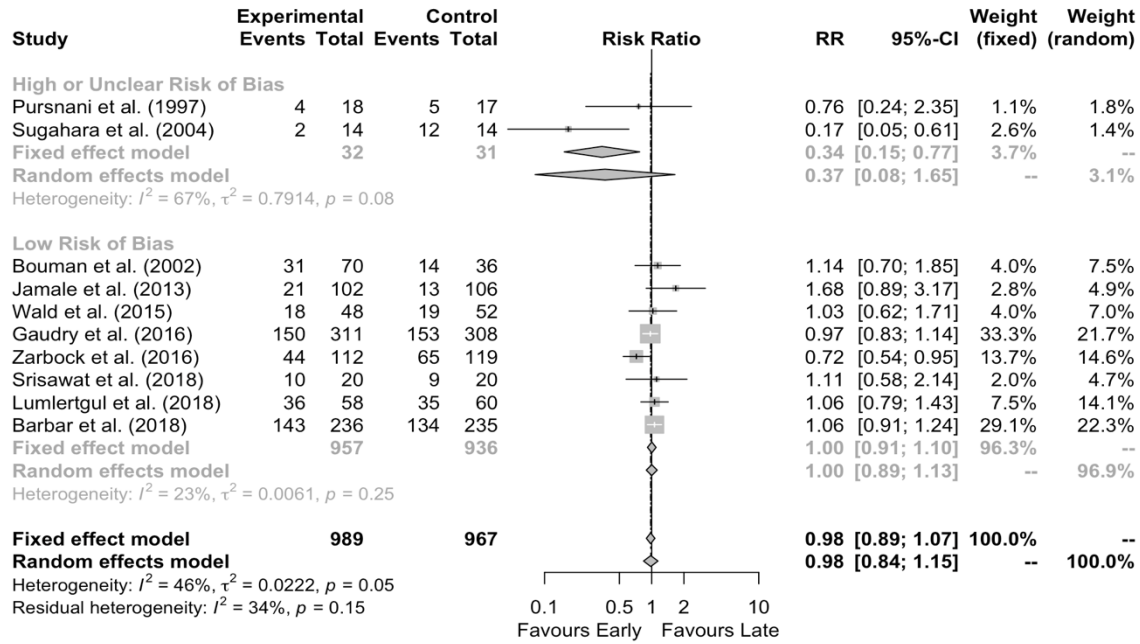

Figure s1.3: Subgroup analysis of low vs high/unclear risk of bias

## RRT Modality

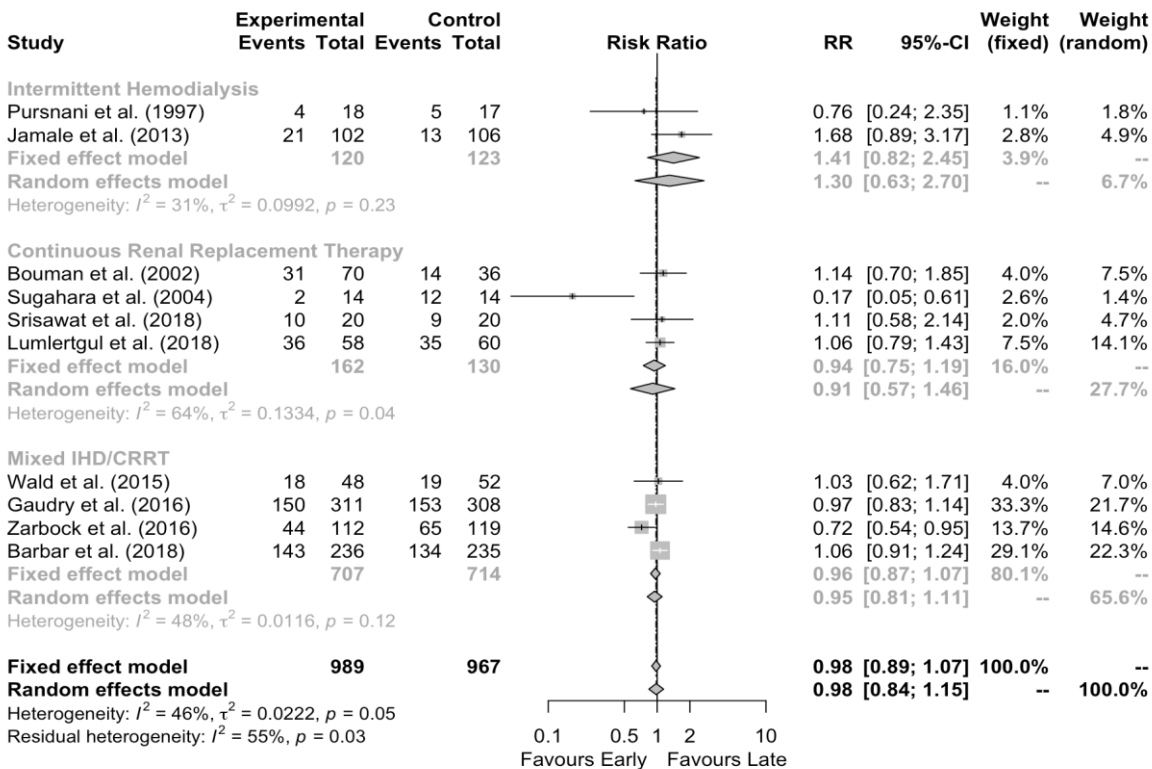

Figure s1.4: Subgroup analysis of RRT modality

## Patient Location

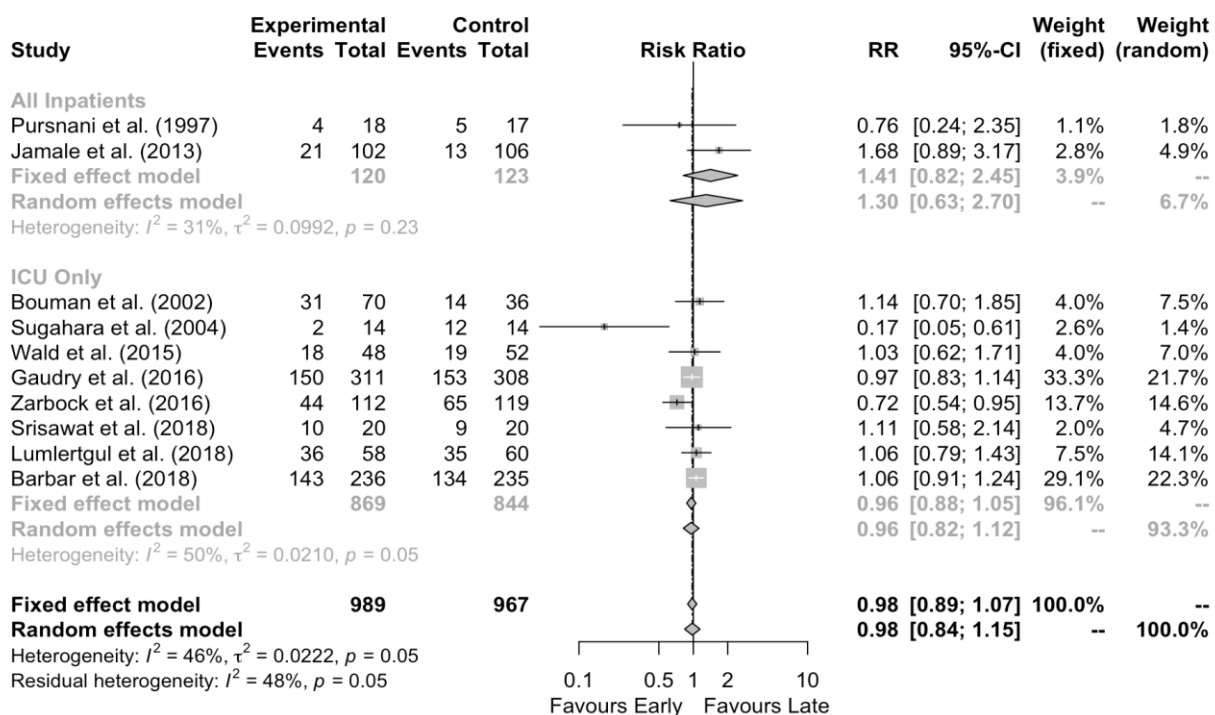

**Figure s1.5: Subgroup analysis of inpatients vs ICU only patients**

## Medical/Surgical Patients

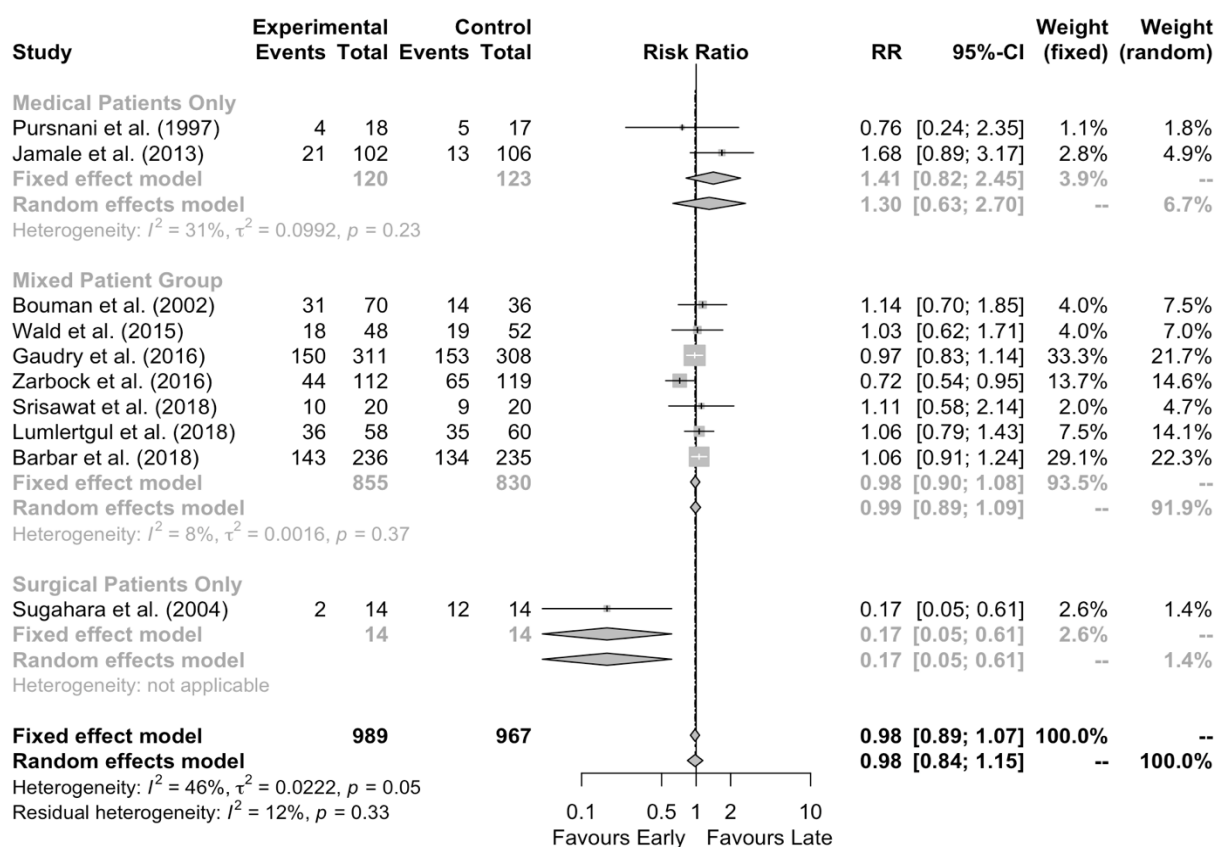

**Figure s1.6: Subgroup analysis of medical, surgical and mixed patient population**

### Dialysis Dependence at Day 90 (in survivors)

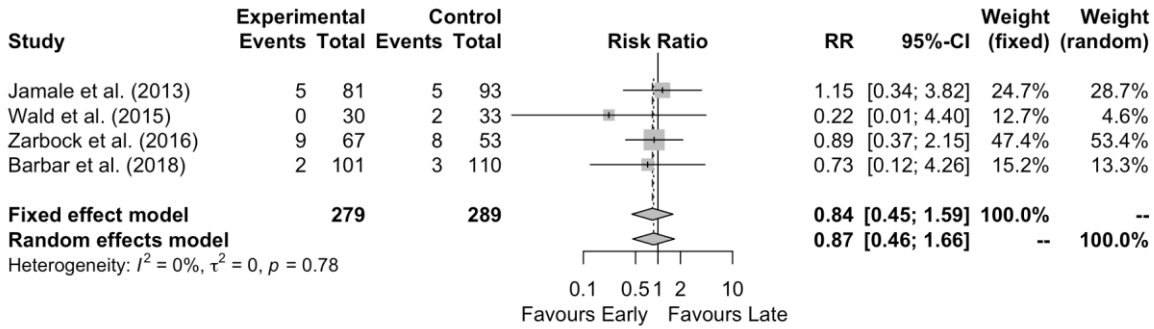

Figure s1.7: Dialysis dependence in survivors at 90 days

### Dialysis Dependence (in survivors)

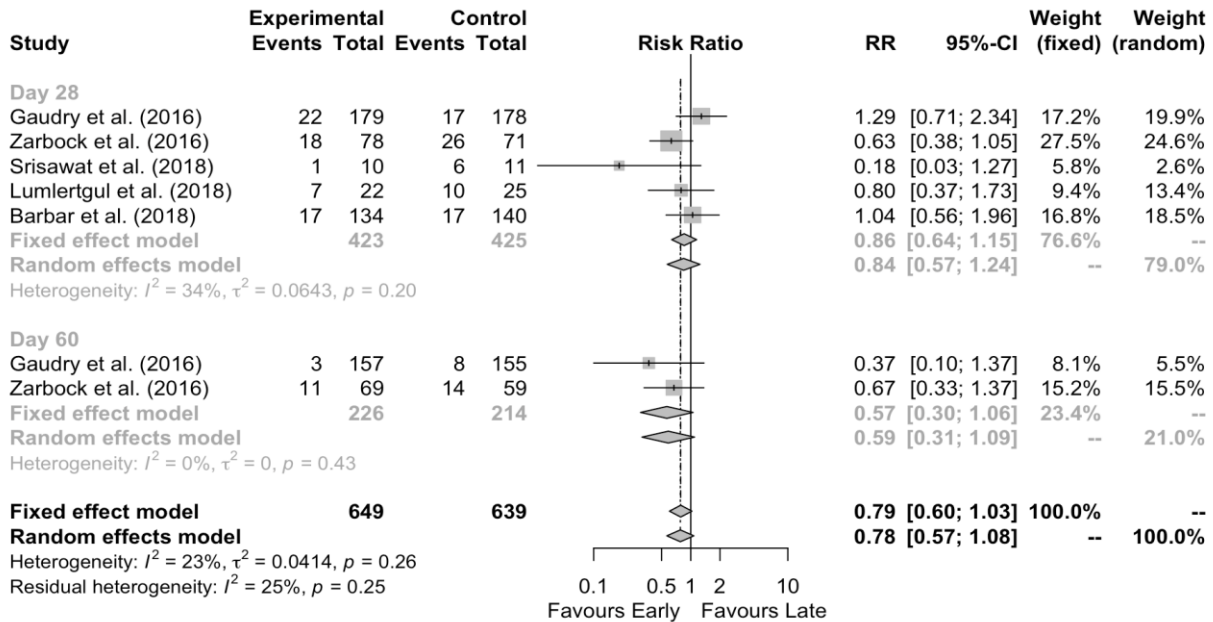

Figure s1.8: Dialysis dependence in survivors at 28 and 60 days

### Renal Recovery at 90 days

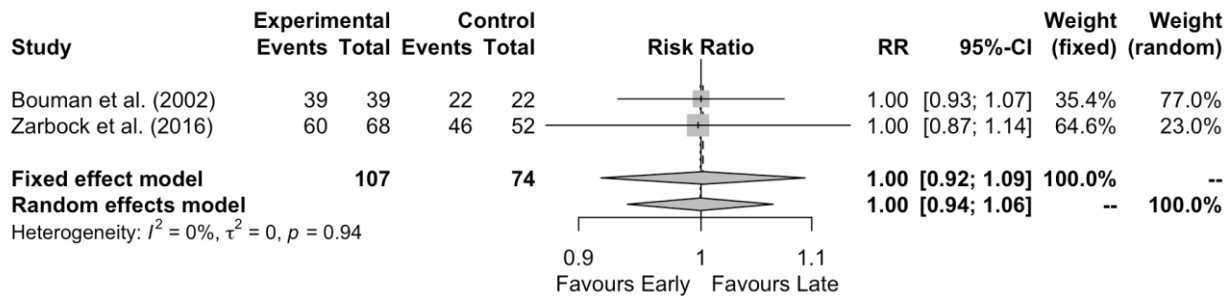

Figure s1.9: Renal recovery in survivors at 90 days

## Adverse Events - Bleeding

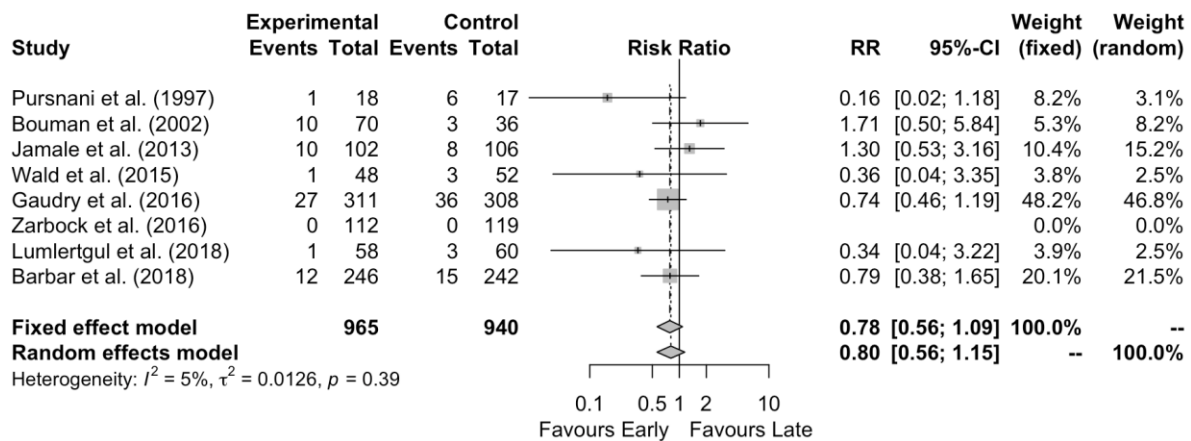

Figure s1.10: Adverse Events - Bleeding

## Adverse Events - Arrhythmias

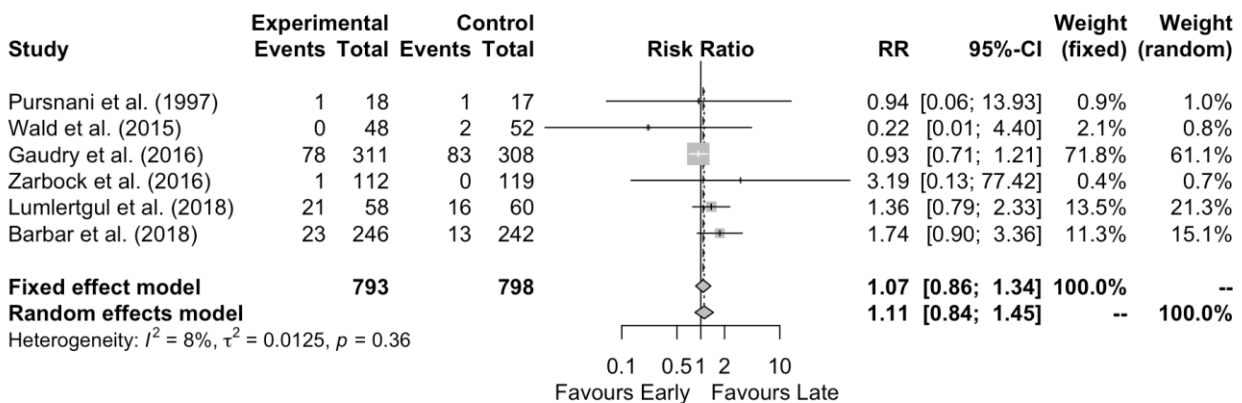

Figure s1.11: Adverse Events – Arrhythmias

## Adverse Events - Hypotension

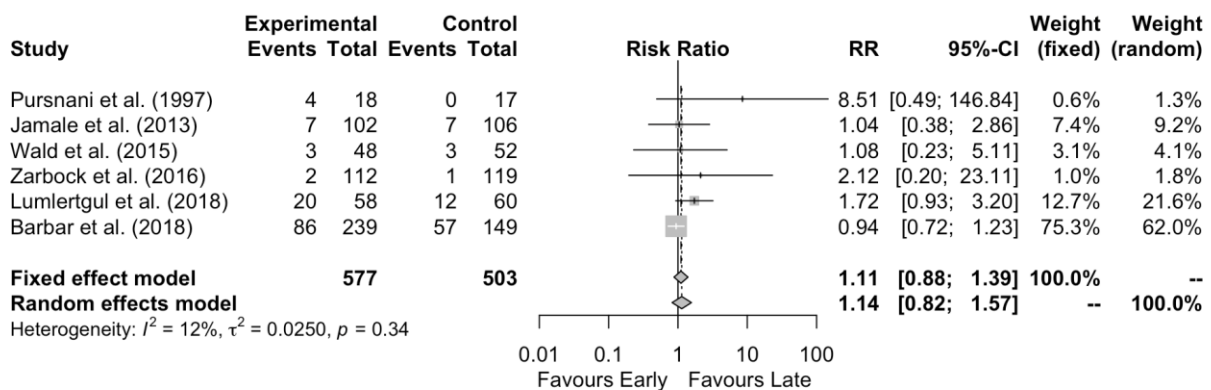

Figure s1.12: Adverse Events – Hypotension

## Adverse Events - Hypokalaemia

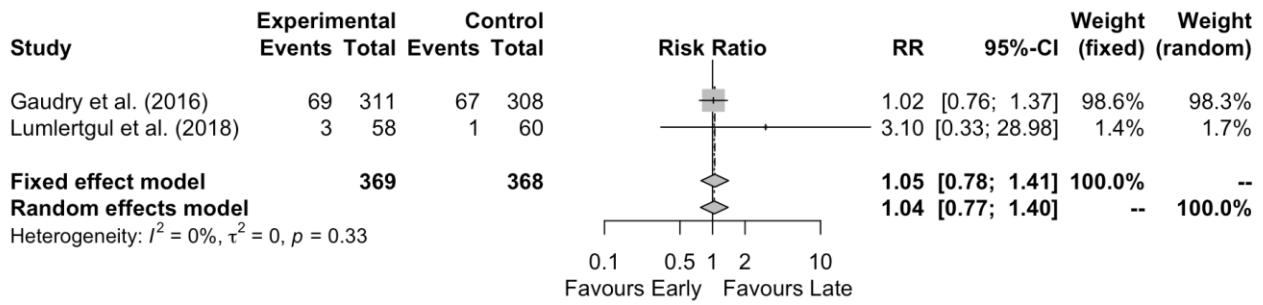

Figure s1.13: Adverse Events - Hypokalaemia

## Adverse Events - Thrombocytopenia

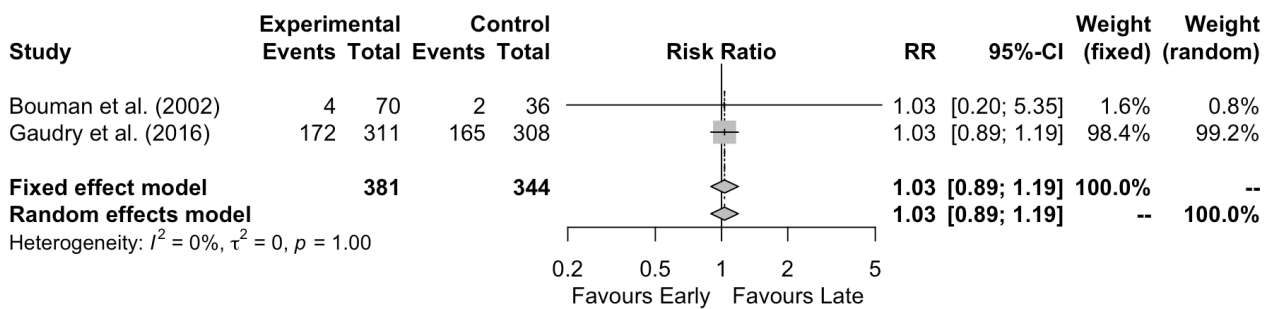

Figure s1.14: Adverse Events – Thrombocytopenia

## Adverse Events - Hypocalcaemia

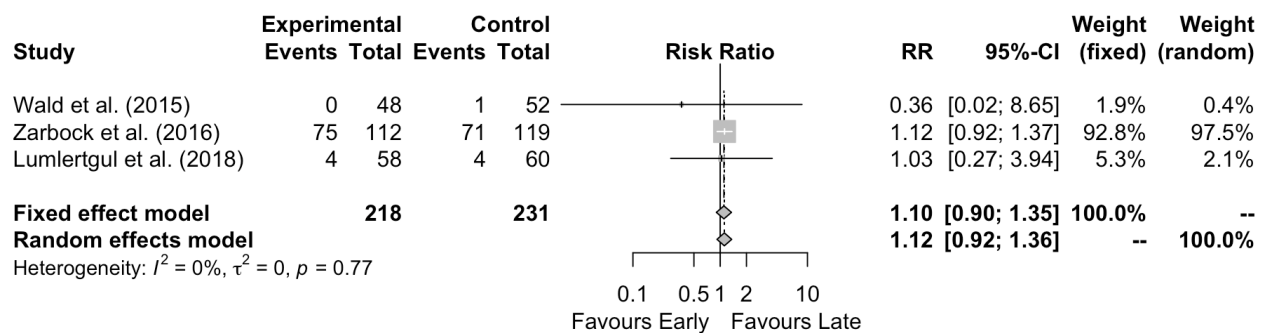

Figure s1.15: Adverse Events – Hypocalcaemia

## Adverse Events - Hyperkalaemia

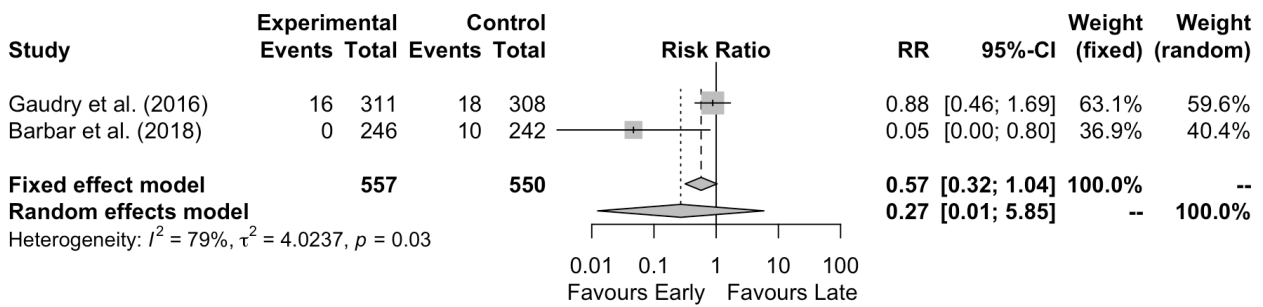

Figure s1.16: Adverse Events - Hyperkalaemia

## Adverse Events - Hypophosphataemia

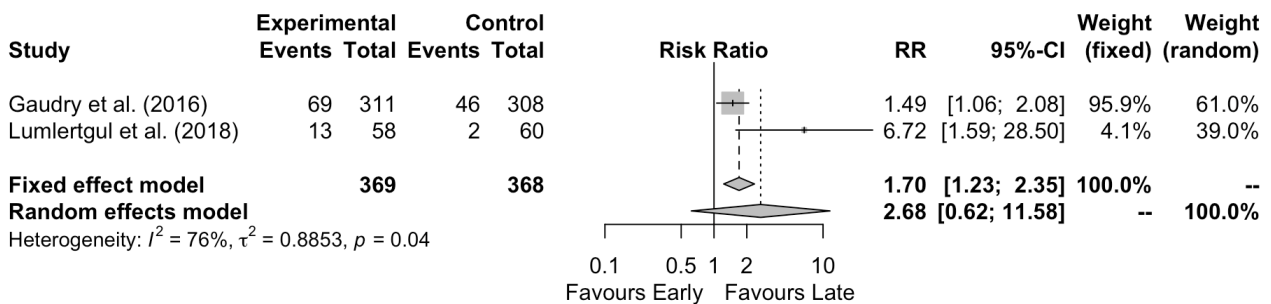

Figure s1.17: Adverse Events – Hypophosphataemia

## Adverse Events - Catheter Related

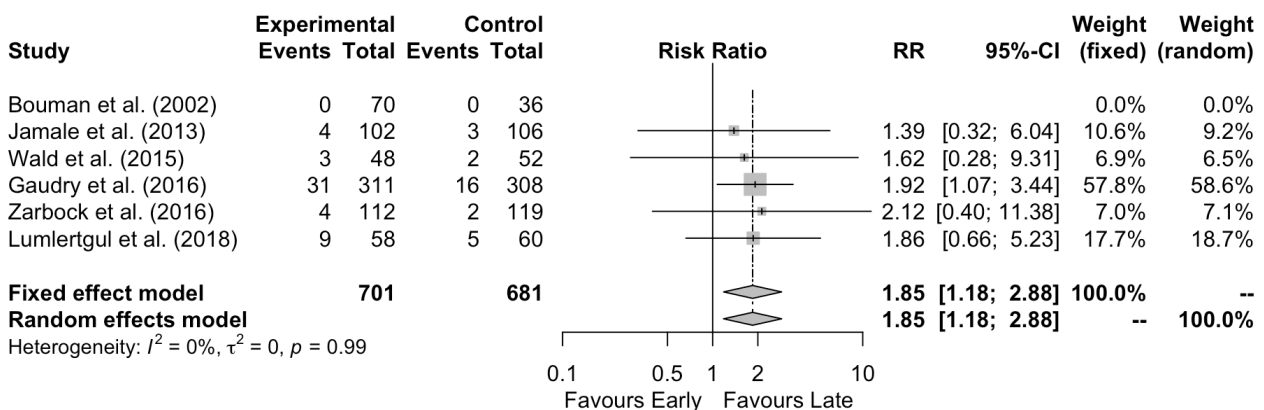

Figure s1.18: Adverse Events - Catheter Related Complications



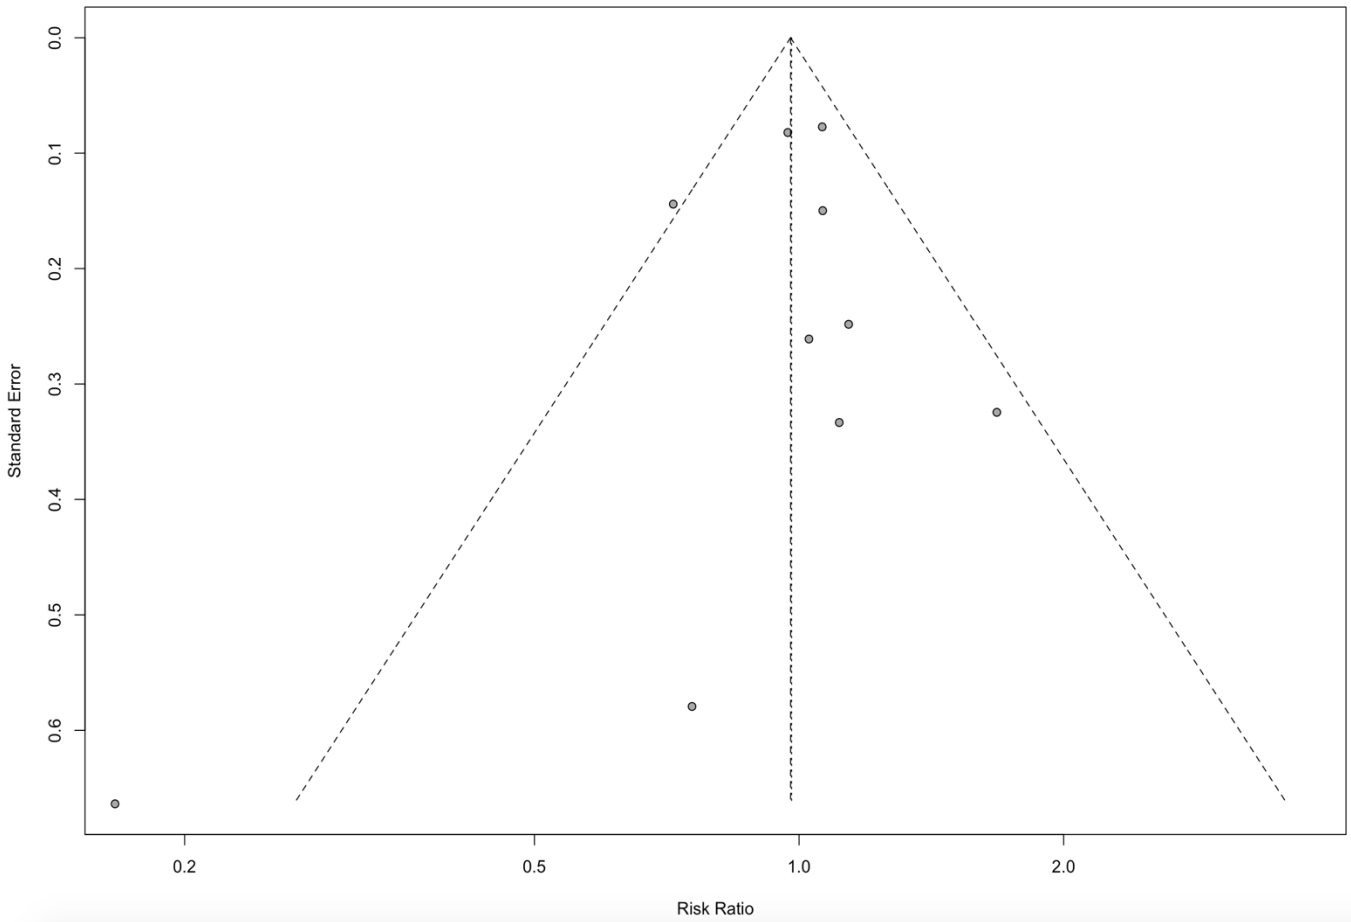

**Figure s1.19: Inverted funnel plot using overall mortality outcome**

| Paper                    | Random Sequence Generation | Allocation Concealment | Blinding of participants and personnel | Blinding of outcome assessment | Incomplete outcome data | Selective Reporting | Other Bias | OVERALL        |
|--------------------------|----------------------------|------------------------|----------------------------------------|--------------------------------|-------------------------|---------------------|------------|----------------|
| <b>Pursnani (1997)</b>   | Unclear                    | Unclear                | Low                                    | Low                            | Low                     | Low                 | Unclear    | <b>Unclear</b> |
| <b>Bouman (2002)</b>     | Unclear                    | Low                    | Low                                    | Low                            | Low                     | Low                 | Low        | <b>Low</b>     |
| <b>Sugahara (2004)</b>   | Unclear                    | Unclear                | Low                                    | Low                            | High                    | Low                 | Unclear    | <b>Unclear</b> |
| <b>Jamale (2013)</b>     | Low                        | Low                    | Low                                    | Low                            | Low                     | Low                 | Low        | <b>Low</b>     |
| <b>Wald (2015)</b>       | Low                        | Low                    | Low                                    | Low                            | Low                     | Low                 | Low        | <b>Low</b>     |
| <b>Gaudry (2016)</b>     | Low                        | Low                    | Low                                    | Low                            | Low                     | Low                 | Low        | <b>Low</b>     |
| <b>Zarbock (2016)</b>    | Low                        | Low                    | Low                                    | Low                            | Low                     | Low                 | Low        | <b>Low</b>     |
| <b>Srisawat (2018)</b>   | Low                        | Low                    | Low                                    | Low                            | Low                     | Low                 | Low        | <b>Low</b>     |
| <b>Lumlertgul (2018)</b> | Low                        | Low                    | Low                                    | Low                            | Low                     | Low                 | Low        | <b>Low</b>     |
| <b>Barbar (2018)</b>     | Low                        | Low                    | Low                                    | Low                            | Low                     | Low                 | Low        | <b>Low</b>     |

**Table s1.1: Risk of bias assessment**

| Outcomes                              | Number of participants (studies) | Anticipated absolute effects (95% CI) * |                                            | Relative effect (95% CI) | Certainty of evidence (GRADE) |
|---------------------------------------|----------------------------------|-----------------------------------------|--------------------------------------------|--------------------------|-------------------------------|
|                                       |                                  | Control group risk (Late initiation)    | Intervention group risk (Early initiation) |                          |                               |
| <b>Overall mortality</b>              | 1956 (10 studies)                | 473 per 1000                            | 464 per 1000 (397 – 544)                   | RR = 0.98 (0.84 – 1.15)  | ⊕⊕⊕⊖<br>LOW <sup>1,2</sup>    |
| <b>In ICU mortality</b>               | 206 (2 studies)                  | 293 per 1000                            | 299 per 1000 (193 – 463)                   | RR = 1.02 (0.66 – 1.58)  | ⊕⊕⊕⊖<br>LOW <sup>3</sup>      |
| <b>In hospital mortality</b>          | 414 (3 studies)                  | 365 per 1000                            | 423 per 1000 (307 – 584)                   | RR = 1.16 (0.84 – 1.60)  | ⊕⊕⊕⊖<br>LOW <sup>3</sup>      |
| <b>28-day mortality</b>               | 1602 (6 studies)                 | 428 per 1000                            | 424 per 1000 (377 – 475)                   | RR = 0.99 (0.88 – 1.11)  | ⊕⊕⊕⊖<br>MODERATE <sup>1</sup> |
| <b>60-day mortality</b>               | 850 (2 studies)                  | 500 per 1000                            | 445 per 1000 (355 – 560)                   | RR = 0.89 (0.71 – 1.12)  | ⊕⊕⊕⊖<br>LOW <sup>1,2</sup>    |
| <b>90-day mortality</b>               | 808 (3 studies)                  | 538 per 1000                            | 500 per 1000 (371 – 662)                   | RR = 0.93 (0.69 – 1.23)  | ⊕⊕⊕⊖<br>LOW <sup>1,2</sup>    |
| <b>Dialysis dependence at 90 days</b> | 568 (4 studies)                  | 57 per 1000                             | 50 per 1000 (26 – 95)                      | RR = 0.87 (0.46 – 1.66)  | ⊕⊕⊕⊖<br>LOW <sup>3</sup>      |

**Table s1.2: GRADE assessment of evidence**

GRADE Working Group grades of evidence

High certainty: We are very confident that the true effect lies close to that of the estimate of the effect

Moderate certainty: We are moderately confident in the effect estimate: The true effect is likely to be close to the estimate of the effect, but there is a possibility that it is substantially different

Low certainty: Our confidence in the effect estimate is limited: The true effect may be substantially different from the estimate of the effect

Very low certainty: We have very little confidence in the effect estimate: The true effect is likely to be substantially different from the estimate of effect

\* The basis for the baseline risk is calculated using the median control group risk across studies. The anticipated absolute effect is expressed as risk difference (and 95% CI) and is based on baseline risk in comparison group and relative effect of intervention

<sup>1</sup>Imprecision – CIs cross threshold for clinically meaningful effect

<sup>2</sup>Inconsistency – Moderate/high heterogeneity

<sup>3</sup>Serious imprecision – CIs significantly wide and crossing threshold for clinically meaningful effect
